# Supplementary material for: The Effects of a Transgelin-2 Agonist Administered at Different Times in a Mouse Model of Airway Hyperresponsiveness
Source: Frontiers journal article supplement (doi:10.3389/fphar.2022.873612), 2022-06-16
Supplement: Data_Sheet_1.PDF [file Data_Sheet_1.PDF]

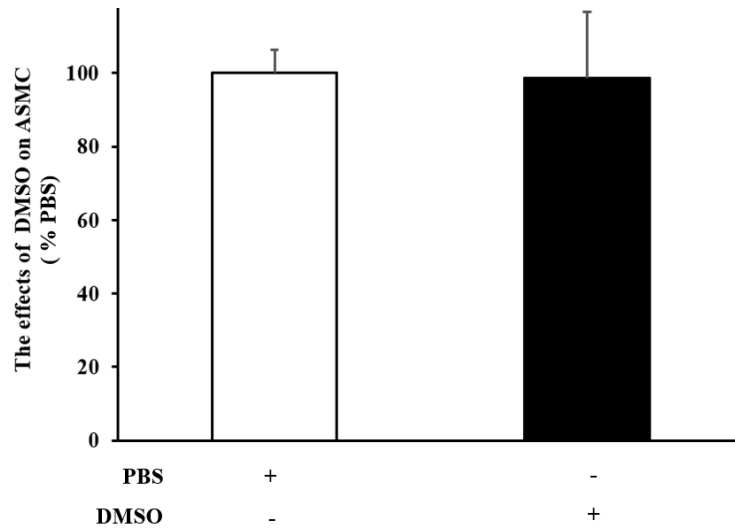

**Figure S1. The comparison of effects of DMSO and PBS on airway smooth muscle cells.** There was no difference between DMSO and PBS on airway smooth muscle cell. Data were presented as the mean  $\pm$  SEM, N=4,  $P < 0.05$  was considered statistically significant. **Abbreviation:** ASMC, airway smooth muscle cells; PBS, phosphate buffered saline; DMSO, dimethyl sulfoxide;

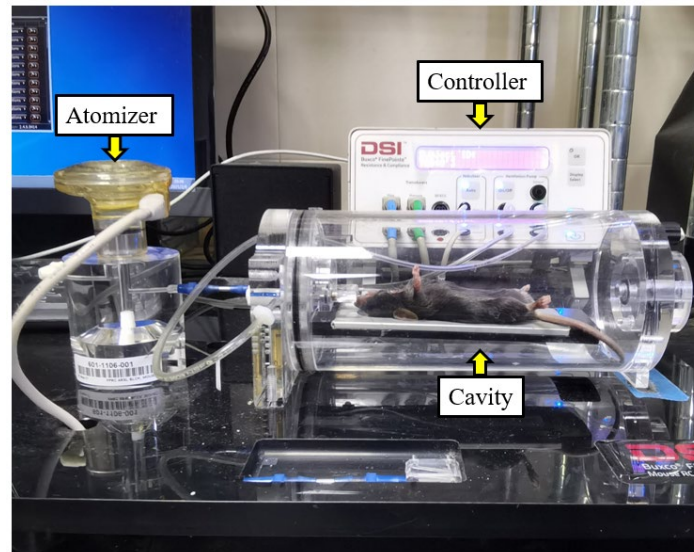

**Figure S2. The photo of pulmonary function measurement in mice using the Resistance and Compliance System**

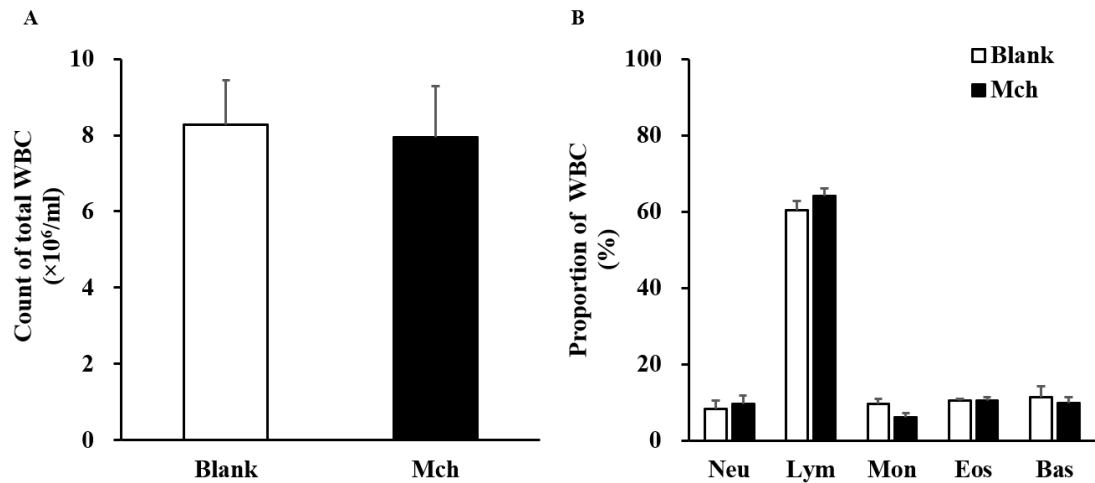

**Figure S3. Inflammatory cell changes after methacholine inhalation in ovalbumin-induced asthma model. (A)** There was no significance difference in the count of total WBC after Mch inhalation. **(B)** There was no significance difference in the proportion of WBC between different groups. Data were presented as the mean  $\pm$  SEM, N=6,  $P < 0.05$  was considered statistically significant. **Abbreviation:** Mch, methacholine; WBC, white blood cell; Neu, neutrophil; Lym, lymphocyte; Mon, monocyte; Eso, eosinophil; Bas, basophil.
